# Supplementary material for: An interview study exploring healthcare professionals’ experiences of supporting health behaviors in migrant women after childbirth with special emphasis on mHealth
Source: Springer Nature journal article supplement (doi:10.1038/s41598-025-01147-3), 2025-05-17
Supplement: MOESM1 [file 41598_2025_1147_MOESM1_ESM.pdf]

# **SUPPLEMENTARY MATERIAL**

## **Supporting health behaviors in migrant women after childbirth with special emphasis on mHealth:**

An interview study with health care professionals

Maryam Shirvanifar<sup>1</sup>, Ulrika Müssener<sup>1</sup>, Alice Lindh<sup>1</sup>, Josefin Wångdahl<sup>2,3</sup>, Pontus  
Henriksson<sup>1</sup>

<sup>1</sup> Department of Health, Medicine and Caring Sciences, Linköping University, Linköping,  
Sweden

<sup>2</sup> Aging Research Center, Karolinska Institutet and Stockholm University, Stockholm,  
Sweden

<sup>3</sup> Department of Public Health and Caring Sciences, Uppsala University, Uppsala, Sweden.

**Corresponding authors:** Pontus Henriksson and Maryam Shirvanifar, Department of Health,  
Medicine and Caring Sciences, Linköping University, 581 83 Linköping, Sweden.

E-mail: [pontus.henriksson@liu.se](mailto:pontus.henriksson@liu.se) and [maryam.shirvanifar@liu.se](mailto:maryam.shirvanifar@liu.se).

Telephone number: +4613-28 10 00.

# **Interview Guide**

## **I. Health promoting work in migrant women after childbirth**

- How would you describe your role in working with migrant women regarding lifestyle and health?
- What responsibility do you think the healthcare system has in promoting a healthy lifestyle after childbirth?
- What opportunities does your professional role offer to promote healthy lifestyle habits after childbirth?
- What opportunities and challenges do you face in your professional role regarding the promotion of healthy lifestyle habits in migrant women after childbirth?
- In what ways is information and support offered to women to help them change their lifestyle after childbirth?
- How do you perceive the opportunities and challenges migrant women face in eating healthily and being physically active after childbirth?

## **II. Health literacy in migrant women after childbirth**

- What role do you see the healthcare system playing in improving migrant women's ability to understand and use health-related information?
- What role do you think your professional role has in improving migrant women's ability to understand and use health-related information?
- Where do you perceive that women obtain health information?
- What opportunities and challenges do you perceive migrant women face in understanding health information?
- What challenges do you perceive that migrant women face in using the information you provide to them?
- What do you think could improve migrant women's ability to obtain and understand health information?

## **III. mHealth app in migrant women after childbirth**

- What information and features do you think are needed in an app to promote a healthy lifestyle for migrant women after childbirth?
- What opportunities and challenges do you see with such an app?
- What is important to consider for the app to be functional linguistically and culturally for the women it is aimed at?

## **IV. Other**

- Is there anything else you wonder about or would like to add?
